# Supplementary material for: Selective Regional Loss of Cortical Synapses Lacking Presynaptic Mitochondria in the 5xFAD Mouse Model
Source: PubMed Central journal article supplement (PMC8267061; doi:10.3389/fnana.2021.690168), 2021-06-25
Supplement: Image_1.pdf [file Image_1.pdf]

## Supplemental Figures

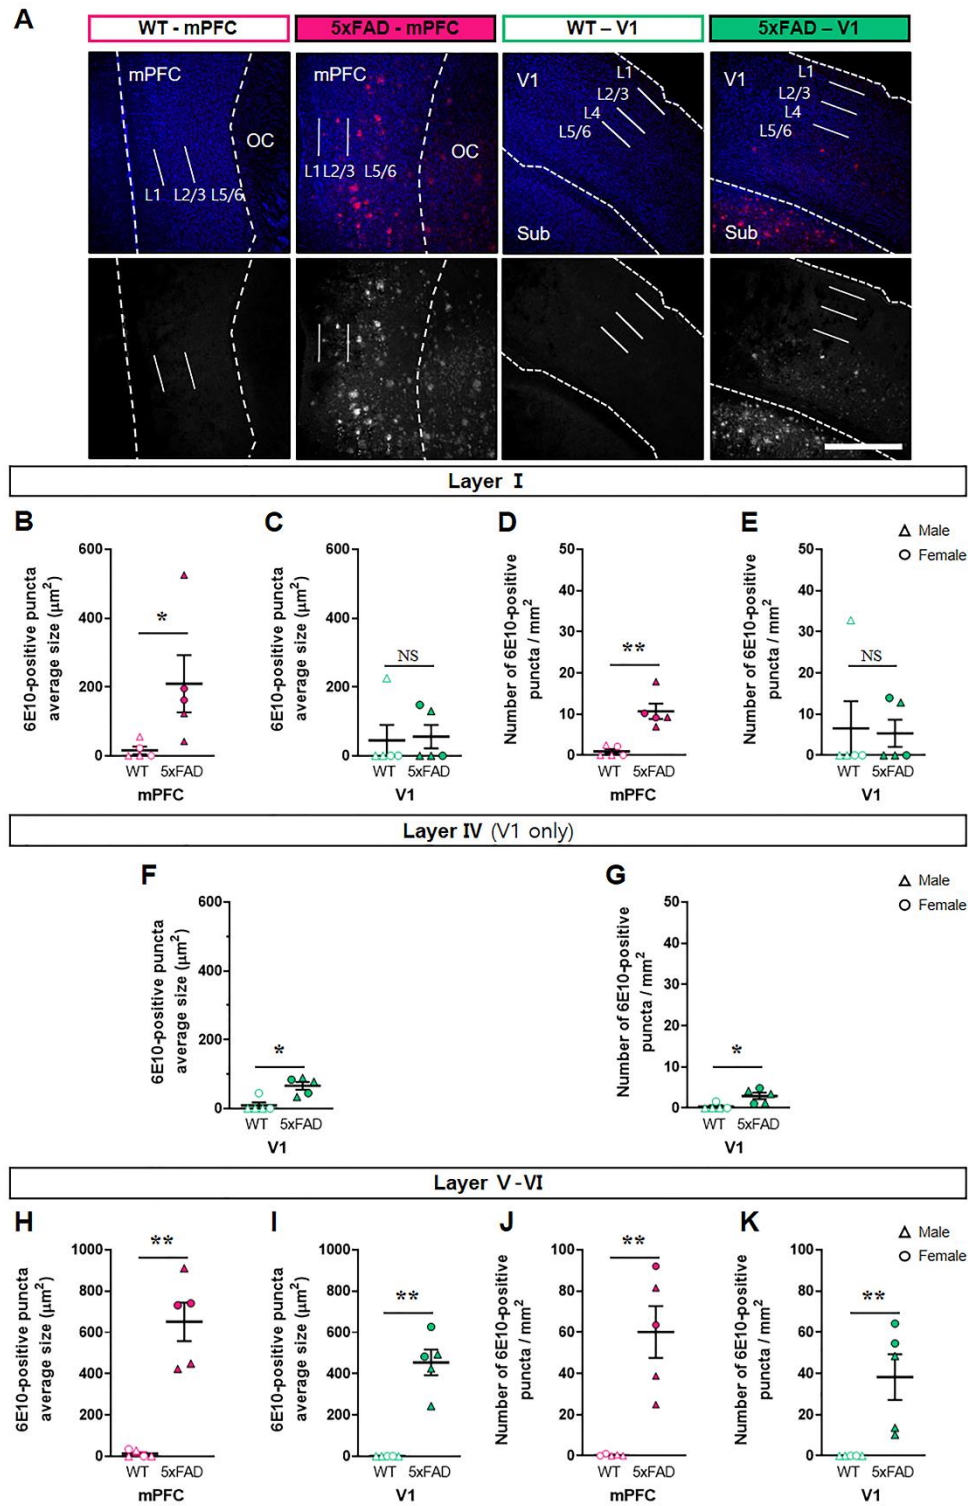

**Figure S1. Layer-specific amyloid accumulation in the 5xFAD cortex.**

(A) Representative fluorescence images of amyloid plaques stained with 6E10 antibody in the mPFC and V1 of wild-type (WT) and 5xFAD mice. Note that mPFC lacks layer 4. Dashed Lines indicate the cortical borders and solid lines indicate the quantified cortical layers. mPFC,

medial prefrontal cortex; V1, primary visual cortex. Scale bars, 500  $\mu\text{m}$ . (B-E) Quantification of amyloid puncta size (B and C) and puncta density (D and E) in layer 1 of the mPFC and V1, respectively (n=5 animals per group). (Layer 1 [puncta size,  $\mu\text{m}^2$ ]: mPFC,  $P = 0.02$ ; V1,  $P > 0.99$ ; [puncta  $\#/\text{mm}^2$ ]: mPFC,  $P = 0.008$ ; V1,  $P > 0.99$ ; Mann–Whitney U test). (F and G) Quantification of amyloid puncta size (F) and puncta density (G) in layer 4 of V1 (n=5 animals per group). (Layer 4 [puncta size,  $\mu\text{m}^2$ ]: V1,  $P = 0.02$ ; [puncta  $\#/\text{mm}^2$ ]: V1,  $P = 0.02$ ; Mann–Whitney U test). (H-K) Quantification of amyloid puncta size (H and I) and puncta density (J and K) in layer 5/6 of the mPFC and V1 (n=5 animals per group). (Layer 5/6 [puncta size,  $\mu\text{m}^2$ ]: mPFC,  $P = 0.008$ ; V1,  $P = 0.008$ ; [puncta  $\#/\text{mm}^2$ ]: mPFC,  $P = 0.008$ ; V1,  $P = 0.008$ ; Mann–Whitney U test). \* $P < 0.05$ , \*\* $P < 0.01$ .

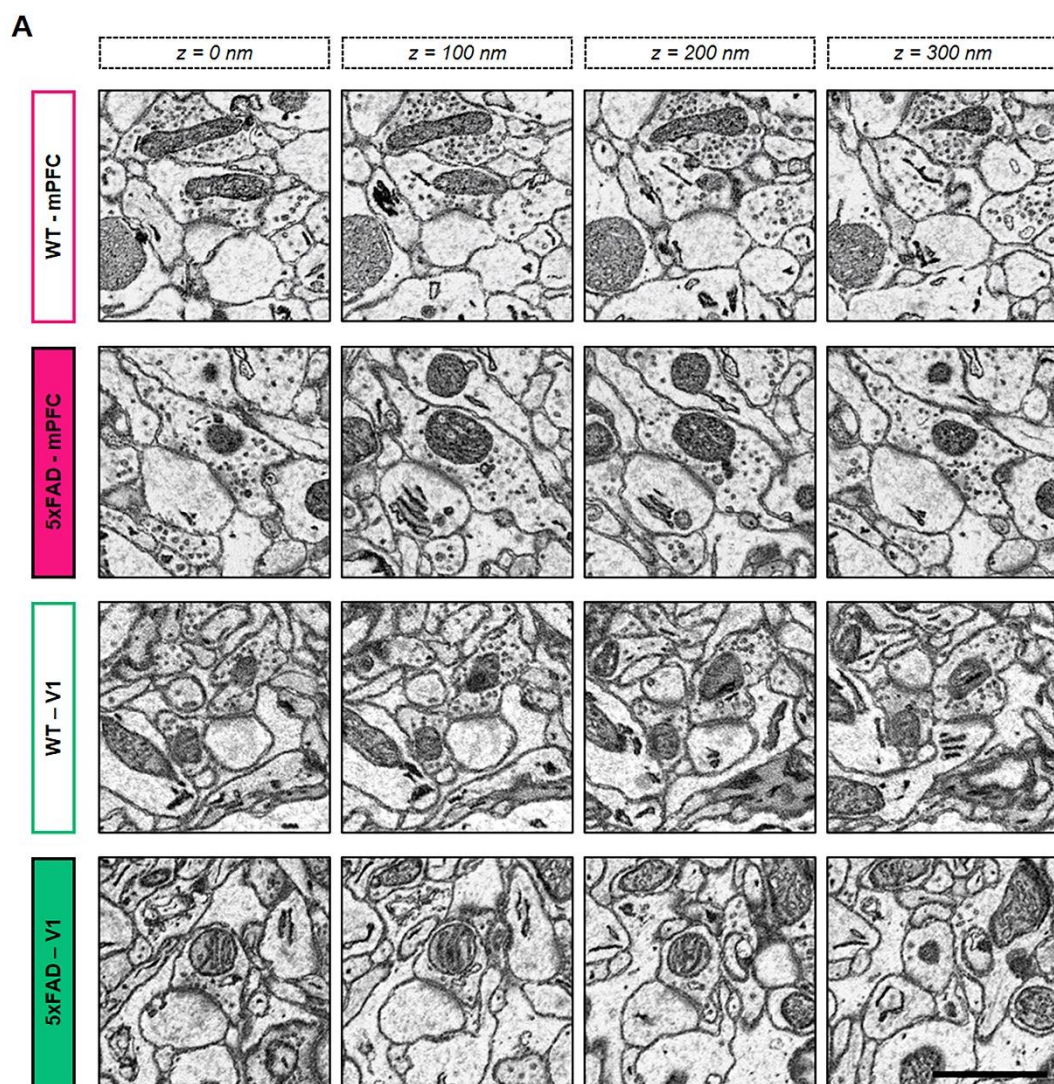

**Figure S2. SB-SEM images acquired in the mPFC and V1 of WT and 5xFAD mice.**

(A) Representative EM images of layer 2 synapses in the mPFC and V1 of WT and 5xFAD mice. Four serial images of the same synapse are shown for each genotype and region. Scale bars, 1  $\mu\text{m}$ .

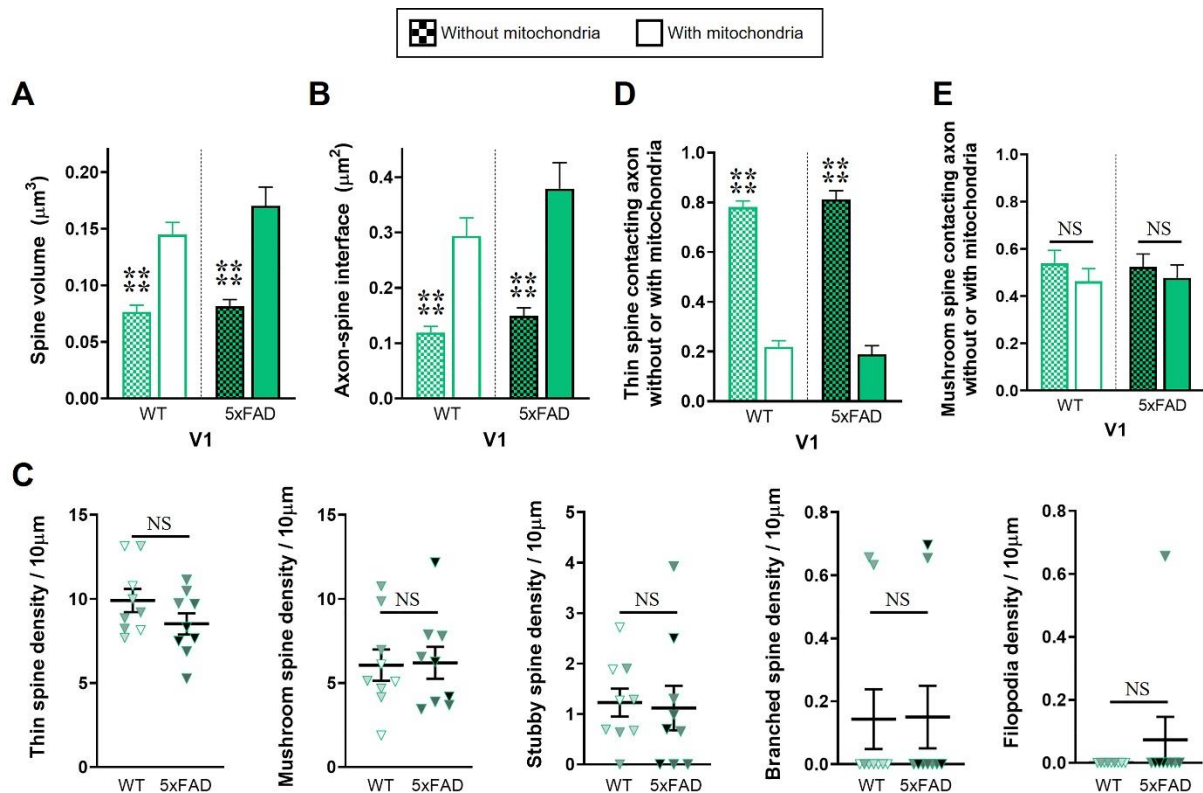

**Figure S3. Morphological analysis of synapses and dendritic spines in the V1 of 6-month-old WT and 5xFAD mice.**

(A and B) Quantification of average spine volume (A) and ASI area (B) of synapses with or without presynaptic mitochondria in the V1 of WT and 5xFAD mice ( $n=61-63$  mitochondria-containing synapses;  $123-126$  mitochondria-lacking synapses). \*\*\*\* $P < 0.0001$ ; Kruskal–Wallis test with post hoc Dunn test. (C) Quantification of the number of spines according to shape per  $10 \mu\text{m}$  dendritic length ( $n=9$  dendrites per group). ([spine #/ $10 \mu\text{m}$ ]: thin,  $P = 0.16$ ; mushroom,  $P = 0.92$ ; stubby,  $P = 0.84$ ; branched,  $P = 0.96$ ; unpaired t-test; filopodia,  $P > 0.99$ ; Mann–Whitney U test). (D) The proportion of thin spines contacting boutons with or without mitochondria in each dendritic segment ( $n=9$  dendrites per group). \*\*\*\* $P < 0.0001$ ; two-way ANOVA with post hoc Tukey test. (E) The proportion of mushroom spines contacting boutons with or without mitochondria in each dendritic segment ( $n=9$  dendrites per group). (WT,  $P = 0.73$ ; 5xFAD,  $P = 0.94$ ; two-way ANOVA with post hoc Tukey test).
