# Supplementary material for: Selective Regional Loss of Cortical Synapses Lacking Presynaptic Mitochondria in the 5xFAD Mouse Model
Source: PubMed Central journal article supplement (PMC8267061; doi:10.3389/fnana.2021.690168), 2021-06-25
Supplement: Table_1.pdf [file Table_1.pdf]

**Table 1. Summary of the quantified parameters in the study.**

| Parameters                                                          | WT_mPFC       |     | 5xFAD_mPFC     |     | WT_V1         |     | 5xFAD_V1       |     |
|---------------------------------------------------------------------|---------------|-----|----------------|-----|---------------|-----|----------------|-----|
|                                                                     | Mean±SEM      | n   | Mean±SEM       | n   | Mean±SEM      | n   | Mean±SEM       | n   |
| <b>Immunostaining using anti-6E10</b>                               |               |     |                |     |               |     |                |     |
| <b>Average size of puncta (<math>\mu\text{m}^2</math>)</b>          |               |     |                |     |               |     |                |     |
| L1                                                                  | 15.62 ± 4.89  | 5   | 209.36 ± 37.13 | 5   | 45.10 ± 20.17 | 5   | 55.59 ± 15.28  | 5   |
| L2-3                                                                | 0.00 ± 0.00   | 5   | 215.37 ± 28.32 | 5   | 17.85 ± 5.14  | 5   | 41.27 ± 10.09  | 5   |
| L4                                                                  | NA            |     | NA             |     | 8.92 ± 3.99   | 5   | 65.82 ± 5.01   | 5   |
| L5-6                                                                | 12.27 ± 3.38  | 5   | 651.14 ± 41.80 | 5   | 0.00 ± 0.00   | 5   | 453.96 ± 27.82 | 5   |
| <b>Number of puncta / <math>\text{mm}^2</math></b>                  |               |     |                |     |               |     |                |     |
| L1                                                                  | 0.93 ± 0.26   | 5   | 10.68 ± 0.84   | 5   | 6.56 ± 2.93   | 5   | 5.35 ± 1.47    | 5   |
| L2-3                                                                | 0.00 ± 0.00   | 5   | 20.87 ± 3.00   | 5   | 0.53 ± 0.17   | 5   | 2.52 ± 0.51    | 5   |
| L4                                                                  | NA            |     | NA             |     | 0.32 ± 0.14   | 5   | 2.93 ± 0.35    | 5   |
| L5-6                                                                | 0.31 ± 0.09   | 5   | 60.11 ± 5.64   | 5   | 0.00 ± 0.00   | 5   | 38.19 ± 4.94   | 5   |
| <b>Electron Microscopy</b>                                          |               |     |                |     |               |     |                |     |
| <b>Dendrite regularity index</b>                                    |               |     |                |     |               |     |                |     |
|                                                                     | 0.24 ± 0.009  | 12  | 0.17 ± 0.005   | 12  | 0.40 ± 0.010  | 9   | 0.39 ± 0.009   | 9   |
| <b>Spine density (# / <math>10\mu\text{m}</math>)</b>               |               |     |                |     |               |     |                |     |
|                                                                     | 16.27 ± 1.35  | 12  | 12.64 ± 0.76   | 12  | 17.27 ± 0.83  | 9   | 16.14 ± 1.49   | 9   |
| <b>Synapse density (# / <math>10\mu\text{m}</math>)</b>             |               |     |                |     |               |     |                |     |
|                                                                     | 14.57 ± 1.14  | 12  | 10.96 ± 0.59   | 12  | 14.28 ± 1.09  | 9   | 13.00 ± 1.02   | 9   |
| Density without presynaptic mitochondria (#/ $10\mu\text{m}$ )      | 8.99 ± 1.05   | 12  | 6.17 ± 0.44    | 12  | 9.59 ± 0.66   | 9   | 8.94 ± 0.76    | 9   |
| Density with presynaptic mitochondria (#/ $10\mu\text{m}$ )         | 5.30 ± 0.44   | 12  | 4.74 ± 0.50    | 12  | 4.69 ± 0.68   | 9   | 4.06 ± 0.41    | 9   |
| Synapse density with multiple mitochondria (#/ $10\mu\text{m}$ )    | 1.91 ± 0.22   | 12  | 0.93 ± 0.20    | 12  | 0.43 ± 0.15   | 9   | 0.65 ± 0.22    | 9   |
| <b>Mitochondria # / bouton</b>                                      |               |     |                |     |               |     |                |     |
|                                                                     | 1.44 ± 0.007  | 96  | 1.23 ± 0.006   | 87  | 1.14 ± 0.007  | 65  | 1.18 ± 0.007   | 61  |
| <b>Mitochondrial volume (<math>\mu\text{m}^3</math>)</b>            |               |     |                |     |               |     |                |     |
|                                                                     | 0.04 ± 0.0002 | 138 | 0.05 ± 0.0002  | 106 | 0.05 ± 0.0004 | 74  | 0.05 ± 0.0005  | 71  |
| <b>Spine volume (<math>\mu\text{m}^3</math>)</b>                    |               |     |                |     |               |     |                |     |
| Spine volume                                                        | 0.09 ± 0.0003 | 289 | 0.10 ± 0.0005  | 228 | 0.09 ± 0.0003 | 239 | 0.09 ± 0.0004  | 238 |
| Spine volume without presynaptic mitochondria                       | 0.06 ± 0.0003 | 154 | 0.06 ± 0.0005  | 104 | 0.08 ± 0.0005 | 134 | 0.08 ± 0.0005  | 132 |
| Spine volume with presynaptic mitochondria                          | 0.15 ± 0.0014 | 97  | 0.18 ± 0.0016  | 85  | 0.14 ± 0.0014 | 65  | 0.17 ± 0.0021  | 61  |
| <b>Axon-spine interface (ASI) area (<math>\mu\text{m}^2</math>)</b> |               |     |                |     |               |     |                |     |
| ASI area                                                            | 0.14 ± 0.0008 | 251 | 0.15 ± 0.0010  | 188 | 0.18 ± 0.0011 | 189 | 0.23 ± 0.0015  | 185 |
| ASI area without presynaptic mitochondria                           | 0.08 ± 0.0007 | 154 | 0.07 ± 0.0009  | 100 | 0.12 ± 0.0010 | 126 | 0.15 ± 0.0013  | 123 |
| ASI area with presynaptic mitochondria                              | 0.24 ± 0.0026 | 95  | 0.24 ± 0.0025  | 87  | 0.29 ± 0.0041 | 63  | 0.38 ± 0.0060  | 61  |
| <b>Spine neck diameter (<math>\mu\text{m}</math>)</b>               |               |     |                |     |               |     |                |     |
| Neck diameter (total)                                               | 0.22 ± 0.0003 | 274 | 0.21 ± 0.0004  | 215 | 0.26 ± 0.0004 | 238 | 0.25 ± 0.0004  | 236 |
| Neck diameter without presynaptic mitochondria                      | 0.21 ± 0.0006 | 146 | 0.21 ± 0.0007  | 101 | 0.26 ± 0.0007 | 133 | 0.25 ± 0.0006  | 131 |
| Neck diameter with presynaptic mitochondria                         | 0.24 ± 0.0009 | 93  | 0.24 ± 0.0013  | 76  | 0.29 ± 0.0015 | 65  | 0.29 ± 0.0018  | 61  |
| <b>Spine head diameter (<math>\mu\text{m}</math>)</b>               |               |     |                |     |               |     |                |     |
| Head diameter (total)                                               | 0.44 ± 0.0007 | 274 | 0.46 ± 0.0011  | 215 | 0.46 ± 0.0008 | 238 | 0.47 ± 0.0009  | 236 |
| Head diameter without presynaptic mitochondria                      | 0.40 ± 0.0010 | 146 | 0.40 ± 0.0012  | 101 | 0.45 ± 0.0013 | 133 | 0.46 ± 0.0014  | 131 |
| Head diameter with presynaptic mitochondria                         | 0.57 ± 0.0026 | 93  | 0.66 ± 0.0035  | 76  | 0.59 ± 0.0027 | 65  | 0.63 ± 0.0038  | 61  |
| <b>Spine shape classification</b>                                   |               |     |                |     |               |     |                |     |
| Thin type (# / $10\mu\text{m}$ )                                    | 7.50 ± 0.83   | 12  | 5.00 ± 0.72    | 12  | 9.91 ± 0.69   | 9   | 8.52 ± 0.63    | 9   |
| Mushroom type (# / $10\mu\text{m}$ )                                | 7.01 ± 0.77   | 12  | 6.28 ± 0.45    | 12  | 6.07 ± 0.93   | 9   | 6.20 ± 0.95    | 9   |
| Stubby type (# / $10\mu\text{m}$ )                                  | 0.44 ± 0.22   | 12  | 0.38 ± 0.13    | 12  | 1.23 ± 0.28   | 9   | 1.12 ± 0.44    | 9   |
| Branched type (# / $10\mu\text{m}$ )                                | 0.88 ± 0.23   | 12  | 0.71 ± 0.23    | 12  | 0.14 ± 0.09   | 9   | 0.15 ± 0.10    | 9   |
| Filopodia type (# / $10\mu\text{m}$ )                               | 0.06 ± 0.06   | 12  | 0.05 ± 0.05    | 12  | 0.00 ± 0.00   | 9   | 0.07 ± 0.07    | 9   |
| <b>Relative distribution of presynaptic partner</b>                 |               |     |                |     |               |     |                |     |
| Thin spine-contacting boutons lacking mitochondria                  | 0.69 ± 0.02   | 12  | 0.63 ± 0.03    | 12  | 0.78 ± 0.01   | 9   | 0.81 ± 0.01    | 9   |
| Thin spine-contacting boutons with mitochondria                     | 0.31 ± 0.02   | 12  | 0.37 ± 0.03    | 12  | 0.22 ± 0.01   | 9   | 0.19 ± 0.01    | 9   |
| Mushroom-contacting boutons lacking mitochondria                    | 0.48 ± 0.02   | 12  | 0.45 ± 0.01    | 12  | 0.54 ± 0.02   | 9   | 0.52 ± 0.02    | 9   |
| Mushroom-contacting boutons with mitochondria                       | 0.52 ± 0.02   | 12  | 0.55 ± 0.01    | 12  | 0.46 ± 0.02   | 9   | 0.48 ± 0.02    | 9   |
